# Supplementary material
Source: PubMed Central journal article supplement (PMC1100768)

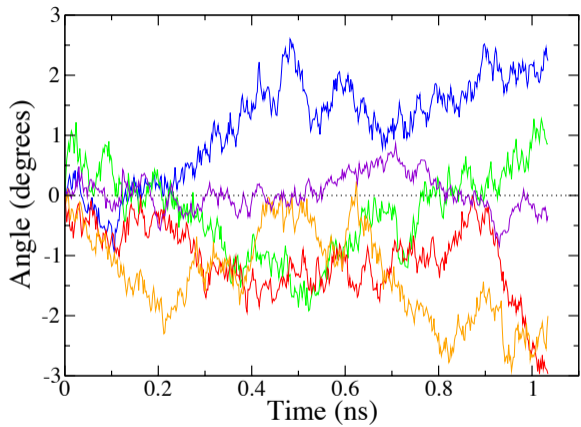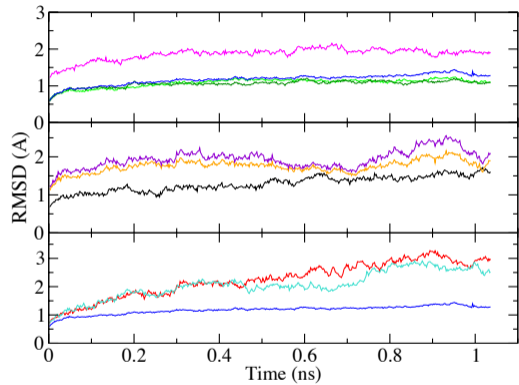

Supplement: pnas_102_19_6783__2.pdf [file pnas_102_19_6783__2.pdf]
